# Supplementary material
Source: HighWire-hosted journal article supplement (https://bmjopen.bmj.com/content/7/6/e014016)
Supplement: inline-supplementary-material-1 [file inline-supplementary-material-1.pdf]

樣本編號：(訪員填寫)

核准機關：行政院主計處 95/06/08  
 核准文號：處普三字第 0950003570 號函核准  
 有效期間：96 年 12 月 31 日止  
 辦理機關：行政院衛生署國民健康局

|   |       |  |  |     |  |  |
|---|-------|--|--|-----|--|--|
| A |       |  |  |     |  |  |
|   | 鄉鎮區代碼 |  |  | 序列號 |  |  |

## 民國 95 年嬰幼兒健康照護需求第二次調查 (18 個月大幼兒)

幼兒姓名：\_\_\_\_\_

幼兒性別：☐1 男 ☐2 女

|                |                               |                                         |            |  |    |                                                             |    |   |
|----------------|-------------------------------|-----------------------------------------|------------|--|----|-------------------------------------------------------------|----|---|
| 回答<br>本問<br>卷者 | 姓名                            |                                         | 與幼兒<br>之關係 |  | 性別 | <input type="checkbox"/> 1. 男 <input type="checkbox"/> 2. 女 | 年齡 | 歲 |
|                | 地址                            | _____ 縣市 _____ 鄉鎮市區 _____ 村里 _____ 路街   |            |  |    |                                                             |    |   |
|                |                               | _____ 段 _____ 巷 _____ 弄 _____ 號 _____ 樓 |            |  |    |                                                             |    |   |
| 電話             | (1) _____ (2) _____ (3) _____ |                                         |            |  |    |                                                             |    |   |

幼兒目前居住地區是：☐1 都市、城市 ☐2 鎮、鄉的街上 ☐3 鄉村、農村有無事先郵寄「給受訪者的信」？☐1 有 ☐0 沒有

前往訪視次數：計 \_\_\_\_\_ 次 完訪訪員姓名：\_\_\_\_\_

本問卷是否一次完成？☐1 是 ☐0 否→分幾次完成：\_\_\_\_\_ 次 最後完成日期：\_\_\_\_\_ 月 \_\_\_\_\_ 日是否為轉介案：☐1. 原分配本調查員之個案 ☐2. 其他調查員轉入之遷移案有無越區訪問：☐1. 沒有 ☐2. 有→ \_\_\_\_\_ 縣市 \_\_\_\_\_ 鄉鎮市區嬰兒發展評量表 ☐1. 完成 ☐2. 無法完成母親健康自覺問卷 ☐1. 完成 ☐2. 完成（多胎另填） ☐3. 無法完成父親健康自覺問卷 ☐1. 完成 ☐2. 完成（多胎另填） ☐3. 無法完成

### 下面訪員請勿填寫

|                                                          |                            |  |
|----------------------------------------------------------|----------------------------|--|
| 補<br>訪<br>問<br>題<br>號<br>碼<br>及<br>核<br>閱<br>員<br>註<br>記 | 初閱者：_____                  |  |
|                                                          | 日期：_____ 年 _____ 月 _____ 日 |  |
|                                                          | 輔導員：_____                  |  |
|                                                          | 日期：_____ 年 _____ 月 _____ 日 |  |
| 複閱者：_____                                                |                            |  |

|  |  |                                                                 |
|--|--|-----------------------------------------------------------------|
|  |  | 日期： ____年____月____日<br><br>過錄者：_____<br><br>日期： ____年____月____日 |
|--|--|-----------------------------------------------------------------|

【本頁由訪員自行填寫】

確認代答者或尋求代答者

X1. 這一本問卷的訪問對象是：

- ☐1 幼兒生母 **【跳填 X4】**
- ☐2 代答者(代答者必須是幼兒的主要照顧者) **【續填 X2、X3】**
- ☐3 幼兒生母與代答者 **【續填 X2、X3】**

X2 本問卷不是由幼兒生母回答的主要原因是：

- ☐1 婚變因素，生母沒有和幼兒住在一起
- ☐2 婚變以外的其他因素，生母已和幼兒分開
- ☐3 生母死亡
- ☐4 生母重聽、耳聾、啞巴
- ☐5 生母為外國籍且語言無法溝通
- ☐6 生母有嚴重精神問題或心智不正常
- ☐7 生母出國，於訪問截止日之前不會回來
- ☐8 其他(請寫出)：\_\_\_\_\_

X3 代答者是幼兒的什麼人？

- |                                |                                |                                |                                 |
|--------------------------------|--------------------------------|--------------------------------|---------------------------------|
| <input type="checkbox"/> 01 生父 | <input type="checkbox"/> 04 繼母 | <input type="checkbox"/> 11 祖父 | <input type="checkbox"/> 13 外祖父 |
| <input type="checkbox"/> 02 繼父 | <input type="checkbox"/> 05 養母 | <input type="checkbox"/> 12 祖母 | <input type="checkbox"/> 14 外祖母 |
| <input type="checkbox"/> 03 養父 |                                |                                |                                 |
| <input type="checkbox"/> 其他家人  |                                |                                |                                 |
| <input type="checkbox"/> 其他親人  |                                |                                |                                 |
| <input type="checkbox"/> 其他非親戚 |                                |                                |                                 |

X4. 幼兒母親現住地址是否與問卷封面【回答本問卷者】註記之地址相同？

- ☐1 相同 **【跳填 X5】**
- ☐2 不同 \_\_\_\_\_

X4a. 幼兒母親現住地址

X5. 幼兒母親聯絡電話是否與問卷封面【回答本問卷者】註記之電話相同？

- ☐1 相同 **【跳填 A 節】**
- ☐2 不同 \_\_\_\_\_

X5a. 幼兒母親聯絡電話

(1) \_\_\_\_\_ (2) \_\_\_\_\_ (3) \_\_\_\_\_

訪問開始時間：☐1 上午 ☐2 下午 \_\_\_\_\_時\_\_\_\_\_分(24 小時制)

導言：\_\_\_\_\_ (幼兒姓名) 這個寶寶大約六個月的時候，我們為瞭解寶寶的情形，曾來訪問過，也謝謝您們接受我們訪問。現在寶寶也差不多一歲半了，我們為瞭解他（她）的成長發育狀況，以協助政府規劃照顧媽媽及小寶寶的計畫，所以再來打擾一下。

## A. 寶寶的生長發育

A1. 我們想先瞭解寶寶出生後至今的生長發育狀況，請您讓我參考寶寶的兒童健康手冊，以抄錄他（她）在 6 個月、12 個月和 18 個月時的體重、身長和頭圍。(請訪員參考兒童健康手冊第 5 頁的生長紀錄表，將各成長時期、或該成長時期加減一個月、或最靠近該成長時期的實際測量日期、足月、頭圍、身高及體重登錄在下表中)

|                  | 測 量 日 期         | 足 歲(月)     | 頭 圍<br>(公分) | 身 高<br>(公分) | 體 重<br>(公斤) | 資 料 來 源                                                                                               |
|------------------|-----------------|------------|-------------|-------------|-------------|-------------------------------------------------------------------------------------------------------|
| A1_1.<br>6±1 個月  | ____年____月____日 | ____月____天 | _____       | _____       | _____       | <input type="checkbox"/> 1 健康手冊<br><input type="checkbox"/> 2 個案口述<br><input type="checkbox"/> 3 沒有資料 |
| A1_2.<br>12±1 個月 | ____年____月____日 | ____月____天 | _____       | _____       | _____       | <input type="checkbox"/> 1 健康手冊<br><input type="checkbox"/> 2 個案口述<br><input type="checkbox"/> 3 沒有資料 |
| A1_3.<br>18±1 個月 | ____年____月____日 | ____月____天 | _____       | _____       | _____       | <input type="checkbox"/> 1 健康手冊<br><input type="checkbox"/> 2 個案口述<br><input type="checkbox"/> 3 沒有資料 |

A2. 我們想瞭解寶寶出生後至今接種疫苗的狀況，請您讓我參考寶寶的兒童健康手冊，以登錄他（她）曾經接種過的疫苗。(請訪員參考兒童健康手冊第 32 頁預防接種時程及紀錄表，並抄錄寶寶從出生至今曾經接種過的疫苗和接種日期)

預防接種時程與紀錄表（A2 題）

| 適合接種年齡    | 疫苗種類                                  |     | 接種日期  | 下次<br>接種<br>建議<br>日期 | 接種<br>單位 | 適合接種年齡                            | 疫苗種類                                   |                                       | 接種日期  | 下次<br>接種<br>建議<br>日期 | 接種<br>單位 |
|-----------|---------------------------------------|-----|-------|----------------------|----------|-----------------------------------|----------------------------------------|---------------------------------------|-------|----------------------|----------|
| 出生 24 小時內 | <input type="checkbox"/> B 型肝炎免疫球蛋白   | 一劑  | 年 月 日 |                      |          | 出生滿 9 個月                          | <input type="checkbox"/> 麻疹疫苗          | 一劑                                    | 年 月 日 |                      |          |
| 出生 24 小時後 | <input type="checkbox"/> 卡介苗          | 一劑  | 年 月 日 |                      |          | 出生滿 12 個月                         | <input type="checkbox"/> 水痘疫苗          | 一劑                                    | 年 月 日 |                      |          |
| 出生滿 2 天   | <input type="checkbox"/> B 型肝炎疫苗      | 第一劑 | 年 月 日 |                      |          |                                   | <input type="checkbox"/> 麻疹腮腺炎德國麻疹混合疫苗 | 第一劑                                   | 年 月 日 |                      |          |
| 出生滿 1 個月  | <input type="checkbox"/> B 型肝炎疫苗      | 第二劑 | 年 月 日 |                      |          |                                   | <input type="checkbox"/> 日本腦炎疫苗        | 第一劑                                   | 年 月 日 |                      |          |
| 出生滿 2 個月  | <input type="checkbox"/> 白喉破傷風百日咳混合疫苗 | 第一劑 | 年 月 日 |                      |          | <input type="checkbox"/> 日本腦炎疫苗   | 隔二周<br>第二劑                             | 年 月 日                                 |       |                      |          |
|           | <input type="checkbox"/> 小兒麻痺口服疫苗     | 第一劑 | 年 月 日 |                      |          |                                   | 出生滿 1 年 6 個月                           | <input type="checkbox"/> 白喉破傷風百日咳混合疫苗 | 第四劑   |                      |          |
| 出生滿 4 個月  | <input type="checkbox"/> 白喉破傷風百日咳混合疫苗 | 第二劑 | 年 月 日 |                      |          | <input type="checkbox"/> 小兒麻痺口服疫苗 |                                        | 第四劑                                   | 年 月 日 |                      |          |
|           | <input type="checkbox"/> 小兒麻痺口服疫苗     | 第二劑 | 年 月 日 |                      |          |                                   | <b>*各項新增或自費接種疫苗登錄</b>                  |                                       |       |                      |          |
| 出生滿 6 個月  | <input type="checkbox"/> B 型肝炎疫苗      | 第三劑 | 年 月 日 |                      |          | 適合接種年齡                            | 疫苗種類                                   | 劑別                                    | 接種日期  | 下次<br>接種<br>建議<br>日期 | 接種<br>單位 |
|           | <input type="checkbox"/> 白喉破傷風百日咳混合疫苗 | 第三劑 | 年 月 日 |                      |          | 出生滿 個月                            | <input type="checkbox"/>               | 第 劑                                   | 年 月 日 |                      |          |
|           |                                       |     |       |                      |          | 出生滿 個月                            | <input type="checkbox"/>               | 第 劑                                   | 年 月 日 |                      |          |
|           |                                       |     |       |                      |          | 出生滿 個月                            | <input type="checkbox"/>               | 第 劑                                   | 年 月 日 |                      |          |
|           | <input type="checkbox"/> 小兒麻痺口服疫苗     | 第三劑 | 年 月 日 |                      |          | 出生滿 個月                            | <input type="checkbox"/>               | 第 劑                                   | 年 月 日 |                      |          |
| 出生滿 個月    |                                       |     |       |                      |          | <input type="checkbox"/>          | 第 劑                                    | 年 月 日                                 |       |                      |          |
| 出生滿 個月    | <input type="checkbox"/>              | 第 劑 | 年 月 日 |                      |          |                                   |                                        |                                       |       |                      |          |

A3. 請問寶寶長第一顆牙齒是第幾個月大的時候？第\_\_\_\_\_個月

A4. 請問寶寶目前已經長幾顆牙齒？已有\_\_\_\_\_顆 ☐ 20 顆全都已經長齊

A5. 請問寶寶現在會做出下面我提到的行為或動作嗎？【訪員請拿出圖文顯示卡，讓受訪者瞭解

每一個行為或動作】

A5a. 【若會】第一次出現這個行為是在出生後滿幾個月？【可以有小數點，如寶寶一歲六個

半月會用筆亂塗，則記為 18.5 月。】【逐項詢問】

| 行為動作           | A5. 小寶寶現在會做出<br>這個行為了嗎？ |     | A5a. 小寶寶第一次出現這<br>個行為是在出生後滿幾個<br>月？ |
|----------------|-------------------------|-----|-------------------------------------|
|                | 0 還不會<br>【跳問下題】         | 1 會 |                                     |
| 1. 雙手扶著傢俱會走幾步  | 0                       | 1   | _____個月                             |
| 2. 可以走得很穩      | 0                       | 1   | _____個月                             |
| 3. 拍手          | 0                       | 1   | _____個月                             |
| 4. 會用筆亂塗       | 0                       | 1   | _____個月                             |
| 5. 以揮手表示「再見」   | 0                       | 1   | _____個月                             |
| 6. 會有意義的叫爸爸、媽媽 | 0                       | 1   | _____個月                             |
| 7. 叫他，他會來      | 0                       | 1   | _____個月                             |
| 8. 會雙手端著杯子喝水   | 0                       | 1   | _____個月                             |

## B. 寶寶的生活照顧

B1. 請問寶寶從他（她）六個月到一歲及一歲以後到現在一歲半(18個月) 這兩段期間，  
白天主要是由誰照顧？

B2. 請問寶寶從他（她）六個月到一歲及一歲以後到現在一歲半(18個月) 這兩段期間，晚上主  
要是由誰照顧？

【本節以單選為主，若無法界定誰是主要照顧者，或是有共同照顧情形發生，則最多兩位，並請  
於下表內勾選之】

|                          | B1. 白天主要照顧者            |                         | B2. 晚上主要照顧者            |                         |
|--------------------------|------------------------|-------------------------|------------------------|-------------------------|
|                          | B1a                    | B1b                     | B2a                    | B2b                     |
| 是這個寶寶的什麼人？               | 6<br>至<br>12<br>個<br>月 | 13<br>至<br>18<br>個<br>月 | 6<br>至<br>12<br>個<br>月 | 13<br>至<br>18<br>個<br>月 |
| (1)母親                    |                        |                         |                        |                         |
| (2)父親                    |                        |                         |                        |                         |
| (3)外公                    |                        |                         |                        |                         |
| (4)外婆                    |                        |                         |                        |                         |
| (5)祖父                    |                        |                         |                        |                         |
| (6)祖母                    |                        |                         |                        |                         |
| (7)本地幫傭（指到宅幫傭）           |                        |                         |                        |                         |
| (8)外籍幫傭                  |                        |                         |                        |                         |
| (9)幼稚園/托兒所/托嬰中心/<br>外送保母 |                        |                         |                        |                         |
| (10)其他（請寫出）_____         |                        |                         |                        |                         |

【訪員注意：寶寶如果是給親戚、朋友，或鄰居照顧，且收取保母費用，本題應圈選第(9)項外送  
保母，而不是第(10)項的其他】

B3. 請問您們 (寶寶父母) 目前的婚姻狀況是：

- ☐1 已婚，夫妻 (寶寶父母) 同住
- ☐2 已婚，夫妻 (寶寶父母) 不同住
- ☐3 已離婚
- ☐4 寶寶父親已過世
- ☐5 寶寶母親已過世

B3a. 那目前寶寶的戶籍跟誰？

- ☐1 跟父親
- ☐2 跟母親
- ☐3 其他 【跳問 B5】  
(請寫出)\_\_\_\_\_

B3b 那這位父親或母親的婚姻狀況是：

B4. 寶寶目前 (大部分時間) 是不是跟爸爸媽媽住在一起？

- ☐1 跟爸爸和媽媽同住
- ☐2 只跟爸爸住
- ☐3 只跟媽媽住

B4a. 那麼平常家裡還有誰和寶寶同住？是寶寶的什麼人？【可複選】

- ☐0 除寶寶的父或母親外，無其他人
- |                               |                                   |                                 |
|-------------------------------|-----------------------------------|---------------------------------|
| <input type="checkbox"/> 1 祖父 | <input type="checkbox"/> 4 外婆     | <input type="checkbox"/> 7 本地幫傭 |
| <input type="checkbox"/> 2 祖母 | <input type="checkbox"/> 5 寶寶兄弟姐妹 | <input type="checkbox"/> 8 外籍幫傭 |
| <input type="checkbox"/> 3 外公 | <input type="checkbox"/> 6 其他親屬   | <input type="checkbox"/> 9 其他   |

B4b.換句話說，包括寶寶在內，平時家裡共有幾個人住在

- ☐4 有些時候才跟爸爸媽媽住，大部份時間沒有

B4c.那麼平常寶寶住在誰的家裡？

- ☐1 祖父母
- ☐2 外祖父母
- ☐3 其他親屬
- ☐4 保母
- ☐5 其他(請寫出)\_\_\_\_\_

B4d.換句話說，包括寶寶在內，平時那個家裡共有幾個人住在一起？

共有\_\_\_\_\_人住在一起

- ☐5 沒有跟爸爸，也沒有跟媽媽住

B4e.那麼平常寶寶住在誰的家裡？

- ☐1 祖父母
- ☐2 外祖父母
- ☐3 其他親屬
- ☐4 保母
- ☐5 其他(請寫出)\_\_\_\_\_

B4f.換句話說，包括寶寶在內，平時那個家裡共有幾個人住在一起？

共有\_\_\_\_\_人住在一起

B5. 請問目前您（寶寶母親）每週跟寶寶相處幾天？\_\_\_\_\_天；除了睡覺以外，每天大約相處幾小時？\_\_\_\_\_小時。

B6. 請問目前寶寶父親每週跟寶寶相處幾天？\_\_\_\_\_天；除了睡覺以外，每天大約相處幾小時？\_\_\_\_\_小時。

B7. 請問您（寶寶生母）在生了這個孩子後，是否曾經請過育嬰假？

- ☐1 是 —————→  
☐2 否

B7a. 總共請多久的育嬰假？ \_\_\_\_\_個月又\_\_\_\_\_天

☐3 原本就沒有工作、或懷這胎或產後即未再工作【跳問 B10】

B8. 請問您（寶寶生母）產後多久回去工作？ 產後\_\_\_\_\_個月；

☐77 目前仍在育嬰假中

B9. 在這個孩子出生後，您(寶寶母親)是否曾經辭過工作？

☐1 是  
↓

☐2 否【跳問 B10】

B9a. 您辭掉工作的理由是：【可複選，至多三項】

- |                                       |                                           |
|---------------------------------------|-------------------------------------------|
| <input type="checkbox"/> 1 又懷孕了       | <input type="checkbox"/> 5 雇主問題           |
| <input type="checkbox"/> 2 自己健康不佳/太疲勞 | <input type="checkbox"/> 6 想換工作，而且已經換工作了  |
| <input type="checkbox"/> 3 為了全心全意照顧孩子 | <input type="checkbox"/> 7 想換工作，目前還沒找到理想的 |
| <input type="checkbox"/> 4 孩子托育問題     | <input type="checkbox"/> 8 其他（請說明）_____   |

B10. 在臨時有需要的時候，您(寶寶母親)是否能夠找到別人(不合同住家人)暫(臨)時幫您照顧寶寶？

- ☐1 一直都無法找到      ☐3 有時可以      ☐4 常常可以找到  
☐2 常常無法找到      ☐5 一定可以找到

B11. **【問卷回答者是寶寶母親】** 您覺得有多少把握勝任媽媽的角色？

**【問卷回答者不是寶寶母親】** 您覺得寶寶母親，勝任媽媽的角色的可能性有多大？

- ☐1 很有把握/很有可能      ☐3 普通      ☐4 不太有把握/不太有可能  
☐2 還算有把握/還算有可能      ☐5 幾乎沒有把握/幾乎沒有可能  
☐8.不適用(例如：母親已死亡、與寶寶分開不同住或不知去向等)

B12. **【問卷回答者是寶寶父親】** 您覺得有多少把握勝任爸爸的角色？

**【問卷回答者不是寶寶父親】** 您覺得寶寶父親，勝任爸爸的角色可能性有多大？

- ☐1 很有把握/很有可能      ☐3 普通      ☐4 不太有把握/不太有可能  
☐2 還算有把握/還算有可能      ☐5 幾乎沒有把握/幾乎沒有可能  
☐8.不適用(例如：父親已死亡、與寶寶分開不同住或不知去向等)

## C. 托育評估

C1. 請問您的寶寶目前有沒有送去幼稚園/托兒所/托嬰中心/保母家給人家帶？【訪員注意：本題請和第3頁B1、B2表中的第10項查核，須B1b或B2b第9項有圈選的才算有送去幼稚園/托兒所/托嬰中心/保母家給人家帶】

☐0 沒有

☐1 有，送去保母家【跳問C2】

☐2 有，送去幼稚園/托兒所/托嬰中心

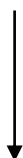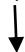

c1a. 機構名稱是：\_\_\_\_\_縣市\_\_\_\_\_鄉鎮市區\_\_\_\_\_【跳問C2】

C1b. 請問您們有沒有考慮過要將寶寶送去幼稚園/托兒所/托嬰中心/保母家給人家帶？

☐0 沒有

☐1 有【跳問D節】

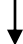

C1b1. 為什麼沒有考慮把寶寶送去給人家帶？

☐1 想要自己帶孩子

☐2 找不到適合的人帶孩子

☐3 托育費用太高

☐4 其他(請說明)\_\_\_\_\_【跳問D節】

C2. 目前寶寶去的這個幼稚園/托兒所/托嬰中心/保母家，是您們托育寶寶的第一個地方嗎？

☐0 是【跳問C3】

☐1 否

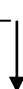

C2a. 您們為什麼會換地方呢？【可複選，至多三個】

☐1. 老師/保母不會帶您的孩子

☐5. 發現有更好的機構/保母

☐2. 老師/保母態度不好

☐6. 搬家

☐3. 孩子不適應

☐7. 決定帶回家自己帶

☐4. 太貴了

☐8. 其他(請寫出)

C3. 請問您們當初主要是如何選到這個地方的？

☐1 自己找的

☐5 向政府有關單位的資訊網查詢的

☐2 親友鄰居推薦的

☐6 他們主動來您家宣傳的

☐3 看到宣傳單

☐7 其他(請寫出)\_\_\_\_\_

☐4 生產前後醫護人員推薦

C4. 請問您們當初選擇這個托嬰中心/保母最重要的原因是？【可複選，至多三個】

- |                                     |                                         |
|-------------------------------------|-----------------------------------------|
| <input type="checkbox"/> 1 離家近，接送方便 | <input type="checkbox"/> 5 老師/保母有證照     |
| <input type="checkbox"/> 2 價格合理     | <input type="checkbox"/> 6 機構收托的孩子人數不多  |
| <input type="checkbox"/> 3 口碑好，有人推薦 | <input type="checkbox"/> 7 環境好、設備全      |
| <input type="checkbox"/> 4 收托時間適當   | <input type="checkbox"/> 8 其他(請寫出)_____ |

C5. 請問這個寶寶目前每個月平均所需托育費用是多少（含幼稚園/托兒所/托嬰中心/保母幫忙帶小孩，含年節送給保母的禮金）？

- |                                      |                                     |
|--------------------------------------|-------------------------------------|
| <input type="checkbox"/> 1 不到5千元     | <input type="checkbox"/> 4 2萬～未滿3萬元 |
| <input type="checkbox"/> 2 5千元～未滿1萬元 | <input type="checkbox"/> 5 3萬元以上    |
| <input type="checkbox"/> 3 1萬元～未滿2萬元 |                                     |

C6. 請問您是否滿意現在這個幼稚園/托兒所/托嬰中心/保母的托育服務？

- |                                 |                               |                                 |
|---------------------------------|-------------------------------|---------------------------------|
| <input type="checkbox"/> 1 很滿意  | <input type="checkbox"/> 3 普通 | <input type="checkbox"/> 4 不太滿意 |
| <input type="checkbox"/> 2 還算滿意 |                               | <input type="checkbox"/> 5 很不滿意 |

C7. 請問您**最滿意**這個幼稚園/托兒所/托嬰中心/保母的地方是：【可複選，至多三個】

- |                                     |                                                |
|-------------------------------------|------------------------------------------------|
| <input type="checkbox"/> 1 給孩子吃得好   | <input type="checkbox"/> 6 離家近                 |
| <input type="checkbox"/> 2 很用心帶小孩   | <input type="checkbox"/> 7 環境整潔衛生安全            |
| <input type="checkbox"/> 3 和您的溝通良好  | <input type="checkbox"/> 8 孩子很喜歡去              |
| <input type="checkbox"/> 4 價格合理     | <input type="checkbox"/> 9 其他孩子不多，您的小孩可以得到較多照顧 |
| <input type="checkbox"/> 5 收托的時間有彈性 | <input type="checkbox"/> 10 其他(請寫出)_____       |

C8. 請問您覺得這個托育服務，對您(寶寶的媽媽或爸爸)來說幫助最大的地方是：【可複選，至多三個】

- |                                            |                                          |
|--------------------------------------------|------------------------------------------|
| <input type="checkbox"/> 1 讓您可以安心上班或做我要做的事 | <input type="checkbox"/> 5 有人可以討論有關帶孩子的事 |
| <input type="checkbox"/> 2 讓您可以有個喘息的機會     | <input type="checkbox"/> 6 孩子多一個疼愛他的家庭   |
| <input type="checkbox"/> 3 跟別人相處，對孩子的成長有好處 | <input type="checkbox"/> 7 其他(請寫出)_____  |
| <input type="checkbox"/> 4 有專家幫您一起照顧孩子     |                                          |

C9.【**寶寶是送到保母家者，免問本題**】請問您知不知道這個幼稚園/托兒所/托嬰中心有沒有立案？

- ☐1 不知道  
☐2 沒有立案/證照

☐3 有

D9a. 是哪一個單位核發的？

- |                                |                                |
|--------------------------------|--------------------------------|
| <input type="checkbox"/> 1 社會局 | <input type="checkbox"/> 3 教育局 |
| <input type="checkbox"/> 2 建設局 | <input type="checkbox"/> 4 不清楚 |

C10. 就您的瞭解，照顧您寶寶的老師/保母，平均同一時間每人平均照顧幾個六歲以下的小孩（含保母自己照顧的六歲以下小孩）？

☐1 一個

☐3 三個

☐5 五個以上

☐2 二個

☐4 四個

☐6 不清楚

C11. 就您所知，照顧您寶寶的老師/保母是不是有幼教證照或保母證照？

☐ 1 有

☐2 沒有

☐3 不清楚

C12. 請問這個幼稚園/托兒所/托嬰中心/保母家，平常是否有人抽菸？

☐1 沒有

☐2 偶而有

☐3 經常有

☐4 天天有

## D. 寶寶的生活型態

D1. 請問您(寶寶媽媽)現在還有沒有在餵寶寶吃母乳？

☐0 沒有  
↓

☐1 有 【跳問 D2】

D1a. 請問您(寶寶媽媽)在寶寶多大時完全停止餵他(她)吃母乳？  
\_\_\_\_\_個月大

D2. 請問您目前是否有餵寶寶吃牛奶、羊奶或其他奶製品？

☐0 沒有 【跳問 D3】

☐1 有  
↓

D2a. 請問是**主要**是那一種牛奶或羊奶或其它奶製品？

☐1 鮮牛奶

☐4 優酪乳

☐2 鮮羊奶

☐5 羊奶粉

☐3 嬰幼兒奶粉

☐6 其他 \_\_\_\_\_

D2b. 請問您的寶寶通常一個星期吃幾次奶製品？

☐1 每週 1 次以下

☐3 每週 3~5 次

☐2 每週 1~2 次

☐4 每天或幾乎每天吃

D2c. 請問寶寶目前有沒有在吃適合過敏體質的特殊奶粉？

☐0 沒有 【跳問 D3】

☐1 有

D2d. 請問是不是**醫生建議**您的寶寶要吃**過敏體質**的特殊奶粉？

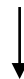

☐0 不是

D2d1. 請問寶寶目前吃那種特殊奶粉？

☐1 低過敏半水解奶粉

☐2 低過敏全水解奶粉

☐3 止瀉奶粉(黃豆配方)

☐4 其他(請說明)\_\_\_\_\_

D3. 請問寶寶目前是否有吃下列這些種類食物?通常一個星期吃幾次呢?

| 食品種類      | 0.從來不吃 | 1.每週 1 次以下<br>或很少吃 | 2.每週 1~2 次 | 3.每週 3~5 次 | 4.每天或<br>幾乎每天吃 |
|-----------|--------|--------------------|------------|------------|----------------|
| 1 肉類      | 0      | 1                  | 2          | 3          | 4              |
| 2 魚、蝦等海鮮類 | 0      | 1                  | 2          | 3          | 4              |
| 3 豆類或豆類製品 | 0      | 1                  | 2          | 3          | 4              |
| 4 蛋類      | 0      | 1                  | 2          | 3          | 4              |
| 5 五穀根莖類   | 0      | 1                  | 2          | 3          | 4              |
| 6 蔬菜類     | 0      | 1                  | 2          | 3          | 4              |
| 7 水果類     | 0      | 1                  | 2          | 3          | 4              |

D4. 請問過去一年內，您們有沒有給寶寶吃營養補充劑?

☐0 無

☐1 有 →

D4a. 請問寶寶吃的是哪一種營養補充劑?【可複選】

☐1 綜合維生素

☐4 比菲多益菌

☐2 魚肝油

☐5 其他(請說明)

☐3 鈣粉

\_\_\_\_\_

D5. 寶寶目前有沒有吸安撫奶嘴?

☐0 從來沒有吃 【跳問 D6】

☐1 以前有吃，現在已沒吃 →

D5a. 請問寶寶多大時完全停止吸安撫奶嘴?

\_\_\_\_\_歲又 \_\_\_\_\_個月大

D5b. 那寶寶有沒有改而吸吮手指?

☐1 沒有

☐3 偶而吸

☐2 很少吸

☐4 每天都吸

【跳問 D6】

☐2 目前有吃 →

D5c. 請問寶寶吸安撫奶嘴的頻率是:

☐1 每天都吸

☐2 偶而吸

☐3 已經很少吸

D6. 請問目前寶寶每天睡眠時間，包括白天、晚上總共大約睡幾小時？

大約\_\_\_\_\_小時

D7. 目前寶寶平常晚上睡覺時，寶寶房間內是否有燈光呢？

☐1 完全沒有燈光    ☐2 有微弱燈光（如夜燈）    ☐3 有明亮燈光

D8. 寶寶目前的睡眠習慣，有沒有給您(主要照顧者)造成困擾？

☐1 非常困擾    ☐2 有些困擾    ☐3 不太有困擾    ☐4 完全沒有困擾

D9. 請問寶寶目前平均每天看電視的時間大約多久？（包括看錄影帶、影碟等都算；而寶寶在保母或托育機構看電視的時間也要算在內）：約\_\_\_\_\_小時\_\_\_\_\_分鐘

D10. 寶寶目前排便習慣是每天排便一次、每天幾次、還是幾天才排便一次？

☐1 每天排便一次

☐2 每天排便\_\_\_\_\_次【請填寫每天排便次數】

☐3 \_\_\_\_\_天才排便一次【請填寫幾天才排便一次之天數】

D11. 過去一年內，寶寶是否曾經因為便秘而去看醫生？

☐0 否

☐1 是

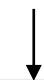

D11a. 過去一年內，總共去看過幾次？

☐1 一次

☐2 二次

☐3 三次或三次以上

D12. 過去一年內，寶寶是否曾經因為腹瀉而去看醫生？

☐0 否

☐1 是

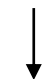

D12a. 過去一年內，總共去看過幾次？

☐1 一次

☐2 二次

☐3 三次或三次以上

D12b. 最嚴重的那一次腹瀉，大約持續幾天？

\_\_\_\_\_天

## E. 寶寶的健康與就醫狀況

E1. 這個寶寶現在已經約一歲半了，整體而言，您認為他/她的健康狀況是很好、好、普通、不太好，還是很不好？

☐1 很好      ☐2 好      ☐3 普通      ☐4 不太好      ☐5 很不好

E2. 整體而言，您認為他/她好不好帶？是很好帶、好帶、普通、不太好帶，還是很不好帶？

☐1 很好帶    ☐2 好帶    ☐3 普通    ☐4 不太好帶    ☐5 很不好帶

E3. 過去一年內（6 個月到 18 個月之間），寶寶是否曾發生過下列我所提到的病症？【逐項詢問  
下表每一項疾病，若「有」該項疾病，務請續問表中接續下去的問題】。

| 疾病或症狀        | E3.小寶寶是否曾經有這個病症？ |     | E3a.這個病症有沒有經過醫生診斷/治療？ |     | E3b.是屬於哪一種？【可複選】                                                                                                                                                                                                                                                                                                            |
|--------------|------------------|-----|-----------------------|-----|-----------------------------------------------------------------------------------------------------------------------------------------------------------------------------------------------------------------------------------------------------------------------------------------------------------------------------|
|              | 0 沒有             | 1 有 | 0 沒有                  | 1 有 |                                                                                                                                                                                                                                                                                                                             |
| 1. 發燒感染疾病    | 0                | 1   | 0                     | 1   | <input type="checkbox"/> 1 泌尿道感染<br><input type="checkbox"/> 2 中耳炎<br><input type="checkbox"/> 3 肺炎<br><input type="checkbox"/> 4 細支氣管炎<br><input type="checkbox"/> 5 川崎症 <input type="checkbox"/> 6 哮喘<br><input type="checkbox"/> 7 上呼吸道感染<br><input type="checkbox"/> 8 扁桃腺發炎<br><input type="checkbox"/> 9 其他(請說明)_____ |
| 2. 腸胃疾病      | 0                | 1   | 0                     | 1   | <input type="checkbox"/> 1 腸套疊<br><input type="checkbox"/> 2 腸胃炎<br><input type="checkbox"/> 3 其他(請說明)_____                                                                                                                                                                                                                 |
| 3. 皮膚病或皮膚過敏病 | 0                | 1   | 0                     | 1   | <input type="checkbox"/> 1 異位性皮膚炎<br><input type="checkbox"/> 2 病毒疹 <input type="checkbox"/> 3 皮膚血管瘤<br><input type="checkbox"/> 4 其他(請說明)_____                                                                                                                                                                             |
| 4. 痙攣        | 0                | 1   | 0                     | 1   | <input type="checkbox"/> 1 單純發燒性痙攣<br><input type="checkbox"/> 2 腦膜炎/腦炎<br><input type="checkbox"/> 3 癲癇(含出生時的病因)<br><input type="checkbox"/> 4 其他(請說明)_____                                                                                                                                                                |



E7. 寶寶在過去一年內（6 個月到 18 個月之間），是否曾經掛過急診？

☐ 0 否

☐ 1 是 —————>

E7a. 急診幾次？ \_\_\_\_\_ 次

E8. 寶寶在過去一年內（6 個月到 18 個月之間），是否曾經住過院？

☐0 否【跳問 E9】

☐1 是

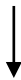

E8a. 共住院幾次？ \_\_\_\_\_ 次

E8b. 是什麼原因？

E8c. 是他/她多大的時候？【若住院超過三次，請詢問從最近一次算起的三次住院狀況】。

|       | E8b. 住院原因 | E8c. 住院月齡         |
|-------|-----------|-------------------|
| 最近一次  | _____     | _____ 歲又 _____ 個月 |
| 再上一次  | _____     | _____ 歲又 _____ 個月 |
| 再上上一次 | _____     | _____ 歲又 _____ 個月 |

E8d. 寶寶是否曾因手術而住院？

☐0 否

☐1 是

E9. 寶寶在過去一年內（6 個月到 18 個月之間），是否曾接受過輸血？

☐0 否【跳問 E10】

☐1 是

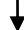

E9a. 請問寶寶接受輸血的原因為何？【可複選】

☐1 手術

☐4 外傷出血

☐2 白血病

☐5 其他先天性貧血

☐3 地中海型貧血

☐6 其他(請說明)\_\_\_\_\_。

E10. 寶寶在過去一年內（6個月到18個月之間），是否曾經因為跌倒或其他事故傷害而去接受醫師治療的呢？中醫、西醫、國術館、接骨所都算。

☐0 否【跳問 E11】

☐1 是

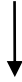

E10a. 過去一年內，總共發生過幾次事故傷害，並且有到醫療院所處理的呢？ 有\_\_\_\_\_次

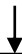

E10b1.那是因為哪種事故傷害類型而到醫療院所處理的？【可複選】

- |                                   |                                          |
|-----------------------------------|------------------------------------------|
| <input type="checkbox"/> 1 跌倒墜落   | <input type="checkbox"/> 7 器物夾壓          |
| <input type="checkbox"/> 2 交通事故   | <input type="checkbox"/> 8 小物品、食品、異物之梗塞  |
| <input type="checkbox"/> 3 尖利物刺割傷 | <input type="checkbox"/> 9 溺水            |
| <input type="checkbox"/> 4 燒燙傷    | <input type="checkbox"/> 10 誤食藥物、清潔劑、殺蟲劑 |
| <input type="checkbox"/> 5 物體或人撞擊 | <input type="checkbox"/> 11 其他(請說明)_____ |

E10b. 其中有幾次住院？ ☐0 否【跳問 E11】 ☐1 有，共\_\_\_\_\_次

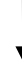

E10b1.那是因為哪種事故傷害類型而住院？【可複選】

- |                                     |                                          |
|-------------------------------------|------------------------------------------|
| <input type="checkbox"/> 1 跌倒墜落     | <input type="checkbox"/> 7 器物夾壓          |
| <input type="checkbox"/> 2 交通事故     | <input type="checkbox"/> 8 小物品、食品、異物之梗塞  |
| <input type="checkbox"/> 3 尖利物刺割傷   | <input type="checkbox"/> 9 溺水            |
| <input type="checkbox"/> 4 燒燙傷      | <input type="checkbox"/> 10 誤食藥物、清潔劑、殺蟲劑 |
| <input type="checkbox"/> 5 物體或人撞擊   | <input type="checkbox"/> 11 其他(請說明)_____ |
| <input type="checkbox"/> 6 動物咬傷抓傷螫傷 |                                          |

E11.整體而言，寶寶看病或住院都要花錢，對您們(寶寶的媽媽爸爸)來說，這種經濟壓力重不重？

☐1 壓力非常重

☐3 普通

☐4 不太有壓力

☐2 有一點重

☐5 完全沒有壓力

## F. 父母親的工作型態與經濟壓力

F1. 請問您（寶寶母親）過去一年有沒有在工作？是一直都有，大部份時間有，約半年時間有，小部份時間有，或一直都沒有在工作？

☐1 一直都有

☐3 約半年時間有

☐4 小部份時間有

☐2 大部份時間有

☐5 一直都沒有

F2. 請問您（寶寶母親）目前有沒有在工作？

☐0 沒有【跳問 F3】

☐1 有

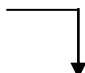

F2a. 您（寶寶母親）目前主要工作的地方是做什麼的？（指公司、機關或事業的性質）

行業：\_\_\_\_\_

F2b. 您（寶寶母親）在那裡是擔任什麼工作或職位？（請詳細記錄具體職位）：

職業：\_\_\_\_\_

F2c. 您（寶寶母親）主要工作的身分是：

☐1 受政府僱用者

☐4 自營作業者（下無員工）

☐2 受私人僱用者

☐5 雇主（下有員工）

☐3 無酬家屬工作者

F2d. 您（寶寶母親）主要工作的地方有多少員工？

☐1 少於 30 人

☐2 30 人以上

F2e. 您（寶寶母親）平均每週上班幾天？每天上班時間幾小時？（包括加班及所有兼差工作）

每週\_\_\_\_\_天；每天\_\_\_\_\_小時（即每週平均工作\_\_\_\_\_小時）

F2f. 您（寶寶母親）的工作時間是：

☐1 白天

☐3 白天、晚上輪流

☐2 晚上

☐4 白天、晚上都工作

F2g. 您（寶寶母親）同不同意「您這份主要職位或工作有保障、很穩定」？

☐1 很同意

☐3 不同意

☐2 同意

☐4 很不同意

F2h. 您（寶寶母親）的主要工作收入是：

- ☐1 固定薪資（含基本薪與各種固定加給）  
☐2 固定底薪加上績效獎金、紅利或加班費  
☐3 無底薪，按件計酬或按時計酬  
☐4 其他(請說明)\_\_\_\_\_

F2i. 您（寶寶母親）覺得目前的工作壓力對您來說重不重？

- ☐1 非常重                      ☐3 普通                      ☐4 不太有壓力  
☐2 有點重                      ☐5 完全沒有壓力

F2j. 您（寶寶母親）覺得目前的工作會不會影響您照顧小孩？

- ☐1 從來不會                      ☐3 有時會                      ☐4 常常會  
☐2 很少會                      ☐5 一直都會

F2k. 請問您（寶寶母親）工作的地方有沒有哺集乳室？

- ☐0 沒有                      ☐1 有

F3. 請問您（寶寶母親）有沒有加入公保或勞農保？

- ☐0 無                      ☐3 農保                      ☐6 漁保  
☐1 公保                      ☐4 軍保  
☐2 勞保                      ☐5 福保

F4. 請問您（寶寶母親）有沒有加入全民健保？

- ☐0 沒有                      ☐1 有

F5. 【訪員查核】 ☐1 寶寶母親目前有工作 【跳問 F6】

☐2 寶寶母親目前有工作，但每週平均工作時數低於 35 小時 【跳問 F6】

☐3 留職停薪 【跳問 F6】

☐4 寶寶母親目前沒有工作

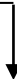

F5a. 您（寶寶母親）目前沒有工作的主要原因是什麼呢？

- ☐1 原本就沒有工作                      ☐6 無工作能力  
☐2 學生                      ☐7 其他原因（說明原因）\_\_\_\_\_  
☐3 為照顧寶寶而把工作辭掉  
☐4 季節性（週期性）休業、暫時停工  
☐5 失業（能工作、想工作、尚未再找到工作）

F6. 請問寶寶父親目前有在工作嗎？

☐0 沒有【跳問 F7】

☐1 有

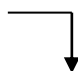

F6a. 寶寶父親目前主要工作的地方是做什麼的？(指公司、機關或事業的性質)

行業：\_\_\_\_\_

F6b. 寶寶父親在那裡是擔任什麼工作或職位？(請詳細記錄具體職位)：

職業：\_\_\_\_\_

F6c. 寶寶父親主要工作的身分是：

☐1 受政府僱用者 ☐4 自營作業者(下無員工)

☐2 受私人僱用者 ☐5 雇主(下有員工)

☐3 無酬家屬工作者

F6d. 寶寶父親主要工作的地方有多少員工？

☐1 少於 30 人

☐2 30 人以上

F6e. 寶寶父親平均每週上班幾天？每天上班時間幾小時？(包括加班及所有兼差工作) 每週\_\_\_\_\_天；每天\_\_\_\_\_小時(即每週平均工作\_\_\_\_\_小時)

F6f. 寶寶父親的工作時間是：

☐1 白天

☐3 白天、晚上輪流

☐2 晚上

☐4 白天、晚上都工作

F6g. 寶寶父親的主要工作收入是：

☐1 固定薪資(含基本薪與各種固定加給)

☐2 固定底薪加上績效獎金、紅利或加班費

☐3 無底薪，按件計酬或按時計酬

☐4 其他(請說明)\_\_\_\_\_

F7. 請問您(寶寶父親)有沒有加入公保或勞農保？

☐0. 無

☐3. 農保

☐6 漁保

☐1. 公保

☐4. 軍保

☐2. 勞保

☐5. 福保

F8. 請問您(寶寶父親)有沒有加入全民健保？

☐0. 沒有

☐1. 有

F9. 【訪員查核】 ☐1 寶寶父親目前有工作【跳問 F10】

☐2 寶寶父親目前有工作，但每週平均工作時數低於 35 小時【跳問 F10】

☐3 留職停薪【跳問 F10】

☐4 寶寶父親目前沒有工作

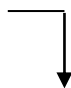

F9a. 寶寶父親目前沒有工作的主要原因是什麼呢？

☐1 學生

☐6 失業（能工作、想工作、尚未再找到工作）

☐2 為了照顧寶寶而把工作辭掉

☐7 無工作能力

☐3 服役（義務兵役）

☐8 原本就沒有工作

☐4 退休了

☐9 其他原因（說明原因）\_\_\_\_\_

☐5 季節性（週期性）休業、暫時停工

F10. 請問你們夫妻倆人（寶寶的爸爸媽媽）最近一年平均每個月的收入，大約有多少：

☐1 不到 1 萬元

☐6 7 萬元～未滿 10 萬元

☐2 1 萬～未滿 2 萬元

☐7 10 萬元～未滿 15 萬元

☐3 2 萬元～未滿 3 萬元

☐8 15 萬元～未滿 20 萬元

☐4 3 萬元～未滿 5 萬元

☐9 20 萬元以上

☐5 5 萬元～未滿 7 萬元

F11. 您（們）照顧這個幼兒的所有花費（包含保母與托育費、飲食、衣物尿布用品及醫療等費用）每月大約多少？\_\_\_\_\_元

F12. 就您們夫妻倆人（寶寶的爸爸媽媽）的收入而言，您覺得照顧這個幼兒所需要的花費，對您們來說經濟壓力重不重？

☐1 非常重

☐3 普通

☐4 不太有壓力

☐2 有點重

☐5 完全沒有壓力

F13. 整體而言，您覺得目前您們家（寶寶的爸爸媽媽）的經濟壓力重不重？

☐1 非常重

☐3 普通

☐4 不太有壓力

☐2 有點重

☐5 完全沒有壓力

## G. 父母親的健康與生活型態

G1. 您(寶寶母親)覺得自己目前的健康狀況如何？

☐1 很好    ☐2 好    ☐3 普通    ☐4 不太好    ☐5 很不好

G2. 和一年前比起來，您(寶寶母親)覺得自己現在的健康情形是比較好、差不多、還是比較差？

☐1 比較好    ☐2 差不多    ☐3 比較差

G3. 您(寶寶母親)覺得您先生(寶寶父親)目前的健康狀況如何？

☐1 很好    ☐2 好    ☐3 普通    ☐4 不太好    ☐5 很不好

G4. 和一年前比起來，您(寶寶母親)覺得您先生(寶寶父親)現在的健康情形是比較好、差不多、還是比較差？

☐1 比較好    ☐2 差不多    ☐3 比較差

G5. 您(寶寶母親)目前的體重多少？ \_\_\_\_\_公斤，寶寶的父親目前體重多少？ \_\_\_\_\_公斤

G6~G8. 接下來想請教有關您(寶寶母親)和寶寶父親的健康狀況和最近就醫情況。

| G6~G8           | a.寶寶母親  |        | 請詳細說明                            | b.寶寶父親  |        | 請詳細說明                            |
|-----------------|---------|--------|----------------------------------|---------|--------|----------------------------------|
|                 | 0<br>沒有 | 1<br>有 |                                  | 0<br>沒有 | 1<br>有 |                                  |
| G6. 有沒有重大傷病卡？   | 0       | 1      | 病名 _____                         | 0       | 1      | 病名 _____                         |
| G7. 有沒有身心障礙手冊？  | 0       | 1      | 名稱與代號：<br>(1) _____<br>(2) _____ | 0       | 1      | 名稱與代號：<br>(1) _____<br>(2) _____ |
| G8. 過去一年裡有無住過院？ | 0       | 1      | _____次                           | 0       | 1      | _____次                           |

G9. 請問您(寶寶母親)和寶寶父親目前有沒有運動習慣，有沒有喝酒、嚼食檳榔的情形，以及每天看電視的時間大約有多久？(運動習慣是指有規律性運動，但平日之工作、家事等不算運動)

| 生活習慣         | G9a. 寶寶母親           |     | G9b. 寶寶父親           |     |
|--------------|---------------------|-----|---------------------|-----|
|              | 0 沒有                | 1 有 | 0 沒有                | 1 有 |
| 1. 運動習慣      | 0                   | 1   | 0                   | 1   |
| 2. 喝酒        | 0                   | 1   | 0                   | 1   |
| 3. 吃檳榔       | 0                   | 1   | 0                   | 1   |
| 4. 平均每天看電視時間 | 約 _____ 小時 _____ 分鐘 |     | 約 _____ 小時 _____ 分鐘 |     |

G10. 請問您（寶寶母親）是否曾經吸過菸？

☐0 沒有吸過

☐1 僅嘗試吸過幾次而已

☐2 有吸過，從以前到現在沒有吸超過 5 包（100 支）菸

☐3 有吸過，從以前到現在有吸超過 5 包（100 支）菸

【跳問 G11】

G10a. 請問您（寶寶母親）過去一個月內是否有吸菸？

☐1 (幾乎)每天吸

☐2 偶爾吸

☐3 已經戒菸

G10a\_1. 平均每天吸菸 \_\_\_\_\_ 支

G10a\_2 平均每個月大概吸菸 \_\_\_\_\_ 支

G10a\_3. 戒菸多久了？戒了 \_\_\_\_\_ 年 \_\_\_\_\_ 個月

G11. 請問寶寶父親是否曾經吸過菸？

☐0 沒有吸過

☐1 僅嘗試吸過幾次而已

☐2 有吸過，從以前到現在沒有吸超過 5 包（100 支）菸

☐3 有吸過，從以前到現在有吸超過 5 包（100 支）菸

【跳問 G12】

G11a. 請問寶寶父親過去一個月內是否有吸菸？

☐1 (幾乎)每天吸

☐2 偶爾吸

☐3 已經戒菸

G11a\_1. 平均每天吸菸 \_\_\_\_\_ 支

G11a\_2 平均每個月大概吸菸 \_\_\_\_\_ 支

G11a\_3. 戒菸多久了？戒了 \_\_\_\_\_ 年 \_\_\_\_\_ 個月

G13. 家裡除了寶寶的父母親以外，還有沒有人抽菸？

☐0 沒有【跳問 G15】

☐1 有  
↓

G13a. 包括寶寶的父母親，家裡共有幾個人抽菸？

\_\_\_\_\_ 人抽菸

G13b. 其中抽最多菸的人，每天平均抽多少菸？

☐1 半包以下    ☐2 半包至一包    ☐3 一包以上

G14. 寶寶出生後，他(她) 是否每天或經常、或偶而、或完全不會吸到二手菸？

☐1 每天會

☐2 經常會

☐3 偶而會

☐4 完全不會

G15. 【訪員查核】 ☐1 受訪對象是寶寶母親

☐2 受訪對象不是寶寶母親【跳問 G21】

★G16. 接下來，我會問到一些您(寶寶母親)和家人(寶寶家庭) 的相處情形，請您就實際情況來回答【「家人」是指與您住在一起的家人】。【外籍配偶請利用翻譯卡來作答】

|                                          | 幾乎<br>很少 | 有時<br>這樣 | 經常<br>這樣 |
|------------------------------------------|----------|----------|----------|
| 1. 當您遭遇困難時，可以從家人得到滿意的幫助。                 | 1        | 2        | 3        |
| 2. 您很滿意家人與您討論各種事情，以及分擔問題的方式。             | 1        | 2        | 3        |
| 3. 當您希望從事新的活動或發展時，家人都能接受且給予支持。           | 1        | 2        | 3        |
| 4. 您很滿意家人對您表達情感的方式，以及對您的情緒(如憤怒、悲傷、愛)的反應。 | 1        | 2        | 3        |
| 5. 您很滿意家人與您共度時光的方式。                      | 1        | 2        | 3        |

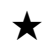

G17. 您(寶寶母親) 對您目前的婚姻關係覺得滿不滿意？

☐1 非常滿意

☐3 普通

☐4 不滿意

☐2 滿意

☐5 非常不滿意

★G18. 過去一年來，為了要照顧這個寶寶，您(寶寶母親)覺得時間壓力重不重？

☐1 非常重

☐3 普通

☐4 不太有壓力

☐2 有點重

☐5 完全沒有壓力

★G19. 過去一年來，為了要照顧這個寶寶，您(寶寶母親)覺得心理壓力重不重？

☐1 非常重

☐3 普通

☐4 不太有壓力

☐2 有點重

☐5 完全沒有壓力

★G20. 您(寶寶母親)覺得過去一年來照顧這個寶寶，對您的社交生活來說，壓力重不重？

☐1 非常重

☐3 普通

☐4 不太有壓力

☐2 有點重

☐5 完全沒有壓力

G21. 除了寶寶外，您(寶寶母親)家中是否還有 **6 歲**以下的小孩需要您照顧？

☐0 沒有

☐1 有，還有\_\_\_\_\_個

G22. 您(寶寶母親)家裡是否有因為生病或其他健康問題，而需要您長期(達三個月或以上)照顧的人？

☐0 沒有

☐1 有，有\_\_\_\_\_人

## H. 父母親童年背景

H1. 接下來，我想請教有關您（寶寶母親）和您先生（寶寶父親）的童年生活環境。首先，請問您和您先生父母親的出生年份和最高學歷是什麼？

|                     | 1. 寶寶祖父                                                                                                                                                                        | 2. 寶寶祖母                                                                                                                                                                        | 3. 寶寶外公                                                                                                                                                                        | 4. 寶寶外婆                                                                                                                                                                        |
|---------------------|--------------------------------------------------------------------------------------------------------------------------------------------------------------------------------|--------------------------------------------------------------------------------------------------------------------------------------------------------------------------------|--------------------------------------------------------------------------------------------------------------------------------------------------------------------------------|--------------------------------------------------------------------------------------------------------------------------------------------------------------------------------|
| H1a. 出生年份；<br>或目前年齡 | 民國/前_____年生<br>；或目前_____歲                                                                                                                                                      | 民國/前_____年生<br>；或目前_____歲                                                                                                                                                      | 民國/前_____年生<br>；或目前_____歲                                                                                                                                                      | 民國/前_____年生<br>；或目前_____歲                                                                                                                                                      |
| H1b. 教育程度           | <input type="checkbox"/> 0 未受正式教育<br><input type="checkbox"/> 1 國小<br><input type="checkbox"/> 2 國(初)中<br><input type="checkbox"/> 3 高中(職)<br><input type="checkbox"/> 4 大專及以上 | <input type="checkbox"/> 0 未受正式教育<br><input type="checkbox"/> 1 國小<br><input type="checkbox"/> 2 國(初)中<br><input type="checkbox"/> 3 高中(職)<br><input type="checkbox"/> 4 大專及以上 | <input type="checkbox"/> 0 未受正式教育<br><input type="checkbox"/> 1 國小<br><input type="checkbox"/> 2 國(初)中<br><input type="checkbox"/> 3 高中(職)<br><input type="checkbox"/> 4 大專及以上 | <input type="checkbox"/> 0 未受正式教育<br><input type="checkbox"/> 1 國小<br><input type="checkbox"/> 2 國(初)中<br><input type="checkbox"/> 3 高中(職)<br><input type="checkbox"/> 4 大專及以上 |

H2. 請問寶寶的祖父母和外祖父母現在的健康情形好不好？【若已死亡，續問其死亡年份或死亡時之年齡】

| 內外祖父母     | 目前健康情形   |         |          |           |           |           | H2a_1~H2d_1.<br>死亡年份<br>或死亡時之年齡 |
|-----------|----------|---------|----------|-----------|-----------|-----------|---------------------------------|
|           | 1.<br>很好 | 2.<br>好 | 3.<br>普通 | 4.<br>不太好 | 5.<br>很不好 | 6.<br>已死亡 |                                 |
| H2a. 寶寶祖父 | 1        | 2       | 3        | 4         | 5         | 6         | 民國_____年死亡<br>；或_____歲死亡        |
| H2b. 寶寶祖母 | 1        | 2       | 3        | 4         | 5         | 6         | 民國_____年死亡<br>；或_____歲死亡        |
| H2c. 寶寶外公 | 1        | 2       | 3        | 4         | 5         | 6         | 民國_____年死亡<br>；或_____歲死亡        |
| H2d. 寶寶外婆 | 1        | 2       | 3        | 4         | 5         | 6         | 民國_____年死亡<br>；或_____歲死亡        |

H3. 請問寶寶的祖父母和外祖父母是否曾有下列一些經過醫生診斷的慢性疾病？

| 疾 病 名 稱       | a. 寶 寶 祖 父      |        | b. 寶 寶 祖 母      |        | c. 寶 寶 外 公      |        | d. 寶 寶 外 婆      |        |
|---------------|-----------------|--------|-----------------|--------|-----------------|--------|-----------------|--------|
|               | 0<br>沒有或<br>不知道 | 1<br>有 | 0<br>沒有或<br>不知道 | 1<br>有 | 0<br>沒有或<br>不知道 | 1<br>有 | 0<br>沒有或<br>不知道 | 1<br>有 |
| 1. 高血壓        | 0               | 1      | 0               | 1      | 0               | 1      | 0               | 1      |
| 2. 心臟病        | 0               | 1      | 0               | 1      | 0               | 1      | 0               | 1      |
| 3. 中風         | 0               | 1      | 0               | 1      | 0               | 1      | 0               | 1      |
| 4. 糖尿病        | 0               | 1      | 0               | 1      | 0               | 1      | 0               | 1      |
| 5. 氣喘         | 0               | 1      | 0               | 1      | 0               | 1      | 0               | 1      |
| 6. 過敏性鼻炎      | 0               | 1      | 0               | 1      | 0               | 1      | 0               | 1      |
| 7. 異位性皮膚炎     | 0               | 1      | 0               | 1      | 0               | 1      | 0               | 1      |
| 8. 胃潰瘍或十二指腸潰瘍 | 0               | 1      | 0               | 1      | 0               | 1      | 0               | 1      |
| 9. 肝臟疾病       | 0               | 1      | 0               | 1      | 0               | 1      | 0               | 1      |
| 10. 腎臟病       | 0               | 1      | 0               | 1      | 0               | 1      | 0               | 1      |
| 11. 甲狀腺       | 0               | 1      | 0               | 1      | 0               | 1      | 0               | 1      |
| 12. 癌症        | 0               | 1      | 0               | 1      | 0               | 1      | 0               | 1      |
| 13. 子宮卵巢疾病    |                 |        | 0               | 1      |                 |        | 0               | 1      |

H4. 您（寶寶母親）從小到生下這個寶寶以前，**大部分**的時間是住在鄉村還是都市？還是兩者約各半？

☐1 大部分住鄉村      ☐2 大部分住都市      ☐3 兩者約各半

H5. 寶寶父親從小到生下這個寶寶以前，**大部分**的時間是住在鄉村還是都市？還是兩者約各半？

☐1 大部分住鄉村      ☐2 大部分住都市      ☐3 兩者約各半

## I. 居住環境

I1. 您認為社會上大多數人都可以信任，或是對人還是小心一點比較好？

- ☐1 多數人都可以信任      ☐2 一半一半      ☐3 還是小心一點比較好

I2. 您認為社會上一般人都願意幫助別人，還是多半只管自己的事？

- ☐1 通常願意幫助別人      ☐2 一半一半      ☐3 多半只管自己的事

【若 B3 題寶寶父母親為已婚，以下「您們/您家」指寶寶爸爸媽媽目前住的地方；若寶寶父母親非已婚（含離婚、父親或母親過世），「您們/您家」指寶寶戶籍跟著的那位目前住的地方；若父母親均已死亡或不知去向，則指他/她大部分時間住的地方】

I3. 整體而言，您覺得您們住的這個地區，適不適合小孩子成長？

- ☐1 非常適合      ☐3 普通      ☐4 不太適合  
☐2 適合      ☐5 非常不適合

I4. 您是否同意「居住在這個地區的人，大多數都是值得信任的」這種說法？

- ☐1 非常同意      ☐3 無意見      ☐4 不同意  
☐2 同意      ☐5 非常不同意

I5. 您是否同意「居住在這個地區的人，大多數都願意幫助別人，而不會只管自己的事」這種說法？

- ☐1 非常同意      ☐3 無意見      ☐4 不同意  
☐2 同意      ☐5 非常不同意

I6. 您們目前的住宅類型是：

- ☐1 平房      ☐3 無電梯公寓大廈      ☐5 三合院  
☐2 透天厝      ☐4 電梯公寓大廈      ☐6 其他\_\_\_\_\_

I7. 您們現居住家的室內空間多大？總共 \_\_\_\_\_ 坪。

I8. 您們現居住家的室內空間規劃有幾間房間和幾套衛浴？（客廳、廚房、餐廳不算在內，但做為他用的房間例如：儲藏室、書房要算在內）：

共有 \_\_\_\_\_ 間房間，全套衛浴 \_\_\_\_\_ 間，半套衛浴 \_\_\_\_\_ 間

I9. 請問你們目前居住的這間房子的所有權是屬於誰的？

- ☐1 夫妻自有      ☐3 配住（宿舍）      ☐4 租用  
☐2 親屬自有      ☐5 其他（請說明）\_\_\_\_\_

I10. 整體而言，您覺得您們房子的狀況，適不適合小孩居住？

- ☐1 非常適合                      ☐3 普通                      ☐4 不太適合  
☐2 適合                                      ☐5 非常不適合

I11. 在這個寶寶出生後，您們是否曾經搬過家（也就是住址不同於現居住家）？

- ☐0 否 **【跳問 I12】**                      ☐1 是  
↓

I11a. 您們在這個寶寶出生後搬到現在這個住家，是第幾次搬家？  
第\_\_\_\_\_次

I11b. 當時決定搬到現在這個住家的最主要理由是：

- |                                       |                                      |
|---------------------------------------|--------------------------------------|
| <input type="checkbox"/> 1 屋況較佳       | <input type="checkbox"/> 5 寶寶照顧資源較豐富 |
| <input type="checkbox"/> 2 空間大小較適宜    | <input type="checkbox"/> 6 婚姻關係改變    |
| <input type="checkbox"/> 3 週邊環境（地區）較佳 | <input type="checkbox"/> 7 經濟因素      |
| <input type="checkbox"/> 4 家人或配偶換工作   | <input type="checkbox"/> 8 其他        |

I12. 這個寶寶生下後到現在這一年半期間，他(她)大部份時間是住在都市或鄉村，或兩者約各半？

- ☐1 住鄉村                      ☐2 住都市                      ☐3 兩者約各半

I13. 您(寶寶媽媽/爸爸)家中是否有飼養寵物或小動物？**【若有】**是養什麼寵物或小動物？**【可複選】**

- ☐0 沒有                      ☐1 養狗                      ☐3 養鴿子  
☐2 養貓                      ☐4 其他 **【請說明】** \_\_\_\_\_

I14. 您(寶寶媽媽/爸爸)家中是否有燒香拜拜的習慣？

- ☐0 沒有                      ☐1 每天拜                      ☐3 每月少於一次或重要節日才拜  
☐2 初一、十五拜

I15. 您(寶寶媽媽/爸爸)家中有沒有鋪地毯？**【若有】**請問你們多久清掃地毯一次？

- ☐0 沒有鋪設地毯                      ☐1 每週                      ☐3 每隔幾個月  
☐2 每個月                                      ☐4 每半年以上

I16. 最近半年內，您(寶寶媽媽/爸爸)家中是否曾看到蟑螂出沒？

- ☐0 沒有                      ☐1 幾乎每天                      ☐3 每週 1~3 天  
☐2 每週 4~5 天                      ☐4 每週少於 1 天

I17. 您(寶寶媽媽/爸爸)家中牆壁或浴室是否有出現霉菌斑(壁癌或青苔)?

☐0 沒有

☐1 在一面牆

☐3 在三面牆

☐2 在兩面牆

☐4 在四面牆或以上

I18. 您(寶寶媽媽/爸爸)家中的天花板、地板、或牆壁上是否有發現「因為潮濕而造成的水漬」?

☐ 0 沒有

☐1 在一面牆

☐3 在三面牆

☐2 在兩面牆

☐4 在四面牆或以上

I19. 過去半年，您(寶寶媽媽/爸爸)家中是否曾經積水(包括陽台)? **【若有】** 平均積水多久?

☐0 沒有

☐1 平均 1 天以內

☐3 平均積水 6~10 天

☐2 平均積水 2~5 天

☐4 平均積水大於 10 天

## J. 母親懷孕與生產

J1. 請問寶寶出生的時間是在：

☐1 上午：\_\_\_\_\_點      ☐2 下午：\_\_\_\_\_點

J2. 請問寶寶出生的時候，除了醫護人員外有沒有人進產房在您（寶寶生母）身邊陪產？

☐1 沒有

☐2 有

J2a. 請問是您的什麼人？

☐1 配偶(或寶寶的父親)

☐3 夫家親屬

☐2 娘家親屬

☐4 其他

J3. 請問寶寶是您（寶寶生母）的第幾個小孩？第\_\_\_\_\_個

J4. 自從寶寶出生到現在已經過了約一年半，請問您（寶寶母親）是不是曾再懷孕(有身)過？

☐1 曾

☐2 不曾【跳問下頁】

J4a. 您（寶寶母親）是不是又再添了小寶寶？

☐1 是

J4b. 那小寶寶現在幾個月了？

現在：\_\_\_\_\_個月

【續問 J5】

☐2 不是

J4c. 那您（寶寶母親）是不是現在還在懷孕中？還是已經拿掉、流產或不幸死去(打損)？

☐1 現在懷孕中

J4d. 那您的預產期是什麼時候？\_\_\_\_\_年\_\_\_\_\_月\_\_\_\_\_日

【續問 J5】

☐2 拿掉(墮胎)→有幾次？\_\_\_\_\_次【跳問 K 節】

☐3 流掉(流產)→有幾次？\_\_\_\_\_次【跳問 K 節】

☐4 死產→有幾次？\_\_\_\_\_次【跳問 K 節】

J5. 您（寶寶母親）說您們又添了寶寶/您現在又再懷孕，請問這是您原本預期要有的還是意外的懷孕？

☐1 預期有的

☐2 意外的

☐3 順其自然

【訪員查核】寶寶母親原始國籍是否為外籍或大陸配偶

☐ 1 為本國籍 【跳問 L 節】

## K. 外籍及大陸配偶涵化

### 甲、基本資料

K1. 請問在台灣，您是否有來自(受訪者來自之國家)的親戚或朋友？

☐ 0 沒有

☐ 1 有

K2. 請問您在台灣多常和住在故鄉的親戚朋友聯絡？

☐ 1 至少一週一次

☐ 3 至少半年一次

☐ 2 至少一個月一次

☐ 4 至少一年一次

K3. 請問您在台灣接受過幾年的教育？ \_\_\_\_\_ 年

K4. 請問您到台灣後到現在，有沒有參加過什麼樣的教育班或輔導班？

☐ 0 沒有 【跳問 K5】

☐ 1 有

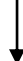

K4a. 請問是什麼班別？【可複選】

☐ 1 生活適應輔導班

☐ 4 外籍配偶識字班

☐ 2 成人基本教育研習班(簡稱成教班)

☐ 5 其他【請說明】

☐ 3 國小補校

\_\_\_\_\_

## 乙、涵化程度（空白部份請訪員說出受訪者來自之國家名稱）

K5. 請問您聽國語的能力：

- |                               |                                    |                                 |
|-------------------------------|------------------------------------|---------------------------------|
| <input type="checkbox"/> 1 很好 | <input type="checkbox"/> 3 普通，不好不差 | <input type="checkbox"/> 4 差/不好 |
| <input type="checkbox"/> 2 好  |                                    | <input type="checkbox"/> 5 很差   |

K6. 請問您說國語的能力：

- |                               |                                    |                                 |
|-------------------------------|------------------------------------|---------------------------------|
| <input type="checkbox"/> 1 很好 | <input type="checkbox"/> 3 普通，不好不差 | <input type="checkbox"/> 4 差/不好 |
| <input type="checkbox"/> 2 好  |                                    | <input type="checkbox"/> 5 很差   |

K7. 請問您讀國語的能力：

- |                               |                                    |                                 |
|-------------------------------|------------------------------------|---------------------------------|
| <input type="checkbox"/> 1 很好 | <input type="checkbox"/> 3 普通，不好不差 | <input type="checkbox"/> 4 差/不好 |
| <input type="checkbox"/> 2 好  |                                    | <input type="checkbox"/> 5 很差   |

K8. 請問您寫國語的能力：

- |                               |                                    |                                 |
|-------------------------------|------------------------------------|---------------------------------|
| <input type="checkbox"/> 1 很好 | <input type="checkbox"/> 3 普通，不好不差 | <input type="checkbox"/> 4 差/不好 |
| <input type="checkbox"/> 2 好  |                                    | <input type="checkbox"/> 5 很差   |

K9. 請問您聽台語的能力：

- |                               |                                    |                                 |
|-------------------------------|------------------------------------|---------------------------------|
| <input type="checkbox"/> 1 很好 | <input type="checkbox"/> 3 普通，不好不差 | <input type="checkbox"/> 4 差/不好 |
| <input type="checkbox"/> 2 好  |                                    | <input type="checkbox"/> 5 很差   |

K10. 請問您說台語的能力：

- |                               |                                    |                                 |
|-------------------------------|------------------------------------|---------------------------------|
| <input type="checkbox"/> 1 很好 | <input type="checkbox"/> 3 普通，不好不差 | <input type="checkbox"/> 4 差/不好 |
| <input type="checkbox"/> 2 好  |                                    | <input type="checkbox"/> 5 很差   |

K11. 請問您在台灣居住的地區，大多數民眾使用什麼語言交談？

- |                               |                               |                                |                                         |
|-------------------------------|-------------------------------|--------------------------------|-----------------------------------------|
| <input type="checkbox"/> 1 國語 | <input type="checkbox"/> 2 台語 | <input type="checkbox"/> 3 客家語 | <input type="checkbox"/> 4 其他【請註明】_____ |
|-------------------------------|-------------------------------|--------------------------------|-----------------------------------------|

K12. 在台灣，您平常使用什麼語言與人交談？

- |                                             |                                               |
|---------------------------------------------|-----------------------------------------------|
| <input type="checkbox"/> 1 全是_____的         | <input type="checkbox"/> 4 多數是本地的             |
| <input type="checkbox"/> 2 多數是_____的        | <input type="checkbox"/> 5 全是本地的              |
| <input type="checkbox"/> 3 一半是_____的，一半是本地的 | <input type="checkbox"/> 6 台灣本地人交談語言和家鄉使用語言相同 |

K13. 在台灣，您較喜歡使用什麼語言與人交談？

- |                                             |                                                |
|---------------------------------------------|------------------------------------------------|
| <input type="checkbox"/> 1 全是_____的         | <input type="checkbox"/> 4 多數是本地的              |
| <input type="checkbox"/> 2 多數是_____的        | <input type="checkbox"/> 5 全是本地的               |
| <input type="checkbox"/> 3 一半是_____的，一半是本地的 | <input type="checkbox"/> 6 台灣本地人交談語言和在台灣使用語言相同 |

K14. 您平常吃哪種食物？

- ☐1 全是\_\_\_\_\_食物      ☐3 一半\_\_\_\_\_食物，一半本地食物      ☐4 多數是本地食物  
☐2 多數是\_\_\_\_\_食物      ☐5 全是本地食物

K15. 您比較喜歡吃哪種食物？

- ☐1 全是\_\_\_\_\_食物      ☐3 一半\_\_\_\_\_食物，一半本地食物      ☐4 多數是本地食物  
☐2 多數是\_\_\_\_\_食物      ☐5 全是本地食物

K16. 您平常和哪些人交往？

- ☐1 全是\_\_\_\_\_人      ☐3 一半\_\_\_\_\_人，一半本地人      ☐4 多數是本地人  
☐2 多數是\_\_\_\_\_人      ☐5 全是本地人

K17. 通常您遇到困難時（如生活適應、情緒低落、經濟困難等）會找誰幫忙？

- ☐1 全是\_\_\_\_\_人      ☐3 一半\_\_\_\_\_人，一半本地人      ☐4 多數是本地人  
☐2 多數是\_\_\_\_\_人      ☐5 全是本地人

K18. 您帶小孩的方式？

- ☐1.全是\_\_\_\_\_方式      ☐3.一半\_\_\_\_\_方式，一半本地方式      ☐5.全是本地方式  
☐2.多數是\_\_\_\_\_方式      ☐4.多數是本地方式      ☐6.兩地無太大差異

K19. 您帶小孩有疑問時，您通常會先向誰請教？

- ☐1 婆家親友      ☐4 台灣的醫護人員  
☐2 住在故鄉的親友      ☐5 沒有人可以請教  
☐3 住在台灣但來自家鄉的親友      ☐6 其他【請註明】\_\_\_\_\_

K20. 您認為自己是：☐1 \_\_\_\_\_人      ☐2 台灣人      ☐3 也是\_\_\_\_\_人，也是台灣人

K21. 過去一年您在帶孩子時，有沒有面臨哪些有關帶小孩的問題？

- ☐0 沒有      ☐1 有

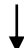

K21a. 是什麼問題？【可複選】

- ☐1 寶寶飲食習慣/問題      ☐4 擔心自己經驗不足  
☐2 寶寶健康狀況      ☐5 其他【請註明】\_\_\_\_\_

## L. 幼兒居家安全簡要檢核表

### 【由訪員觀察填答】

說明：以下幼兒居家安全簡要檢核表—僅以客廳為範圍，由訪員觀察填答，若訪談地點非寶寶大部分居住的家，則詢問受訪者後填答。各項內容只要有部分符合就圈「是」。

| 檢核項目                                                                        | 否 | 是 |
|-----------------------------------------------------------------------------|---|---|
| L1.客廳裡，地面屬堅硬光滑材質（如：大理石、磁磚等），未鋪軟質地毯或地墊。                                      | 0 | 1 |
| L2.客廳裡，家具邊緣（如：沙發、桌、椅、矮櫃等）有尖而硬的凸角或邊緣。                                        | 0 | 1 |
| L3.客廳裡，有小電池、針、釦子、玻璃珠、小髮夾、硬幣、瓶蓋等小物品放在幼兒能拿到的地方。【指約大人腰部以下的地方】                  | 0 | 1 |
| L4.客廳裡，有剪刀、指甲刀、刮鬍刀等尖、利物品或工具（如：起子、釘子、鋸子、打火機、火柴等）放在幼兒能拿到的地方。<br>【指約大人腰部以下的地方】 | 0 | 1 |
| L5.客廳裡，有藥品、化妝品、清潔劑或殺蟲劑放在幼兒能拿到的地方。【指約大人腰部以下的地方】                              | 0 | 1 |
| L6.客廳裡，窗簾的拉繩垂落至幼兒能抓到的地方，或有細繩、塑膠袋等放在幼兒能拿到的地方。【指約大人腰部以下的地方】                   | 0 | 1 |
| L7.客廳裡，未使用的電插座沒有加防護蓋；或開飲機、飲茶爐具等放在幼兒能碰觸的地方。【指約大人腰部以下的地方】                     | 0 | 1 |

L8. 本題組為：☐1. 訪員觀察後填答                      ☐2. 詢問受訪者後填答

問卷到此結束，謝謝您的合作。謝謝！

訪視結束時間：☐1.上午      ☐2.下午      \_\_\_\_\_時\_\_\_\_\_分（採 24 小時制）

## Z . 訪問記實及受訪者簽名

Z1. 本問卷完成時間：

起：\_\_\_\_\_時\_\_\_\_\_分；

迄：\_\_\_\_\_時\_\_\_\_\_分，共計\_\_\_\_\_分鐘。

特殊註記：\_\_\_\_\_

Z2. 領取紀念品之品名：

☐1 便利商店現金禮卷 200 元

☐2 其他(請說明)：\_\_\_\_\_

---

有關上列所記錄之訪問時間，及已領取紀念品品名等均與事實一致。

受訪者簽名、蓋章或蓋手印\_\_\_\_\_

## Y. 訪員觀察及訪問過程狀況記錄

Y1. 與受訪者面談之地點:

☐1 戶籍地    ☐2 現住地    ☐3 工作地點    ☐4 其他【請寫出】: \_\_\_\_\_

Y2. 訪問受訪者的過程中，是不是有其他人在場？

☐1. 有，大部分時間都在場    ☐3. 有，偶而在場  
☐2. 有，約有一半的時間在場    ☐4. 沒有他人在場【跳問 Y3】

Y2a. 【如果有他人在場】他們是小朋友的什麼人？

\_\_\_\_\_

Y2b. 在場的其他人是不是有影響受訪者作答的情形？如何影響？

☐1 有造成干擾    ☐3 在旁注意聽，但沒有加入回答  
☐2 有幫受訪者回答或改正答案    ☐4 沒有影響

Y2c. 受訪者會不會因為有人在場而無法專心作答？

☐1. 一直受到影響    ☐3. 一點點影響  
☐2. 有些影響    ☐4. 不受影響

Y3. 與受訪者交談所用語言【可複選】

☐a.國語    ☐b.台語    ☐c.客家語    ☐d.其他【請寫出】: \_\_\_\_\_

Y4. 受訪者瞭解問題的情形怎麼樣？☐1.很好    ☐2.好    ☐3.尚可    ☐4.很差

Y5. 受訪者合作程度    ☐1.很合作    ☐2.普通    ☐3. 很不合作

Y6. 受訪者回答可靠程度

☐1.全部可靠    ☐2.大部分可靠    ☐3.部分可靠    ☐4.大部分不可靠

↓  
【跳問 Y7】

Y6a. 何題不可靠？(若整頁或整節不可靠，則填頁數或節名)

\_\_\_\_\_

Y7. 有沒有完成六個月大調查時的需求評估與服務轉介同意書的簽署？

☐1.有    ☐2.沒有    ☐3.不需要

Y8. 請寫出有關訪問過程、受訪者反應、或其他特殊狀況、問題：

\_\_\_\_\_

Y9. 寫下有助於再訪時找到該戶(該受訪者)之記述或圖示：

## 幼兒健康照護需求評估與接受轉介服務意願

說明：為即時提供參與本調查個案健康照護配套服務措施，

請訪員查核本問卷嬰兒健康相關資料，填寫以下各題

，以評估其是否須轉介予相關醫療或社會福利單位。

|       |  |  |  |     |  |  |
|-------|--|--|--|-----|--|--|
|       |  |  |  |     |  |  |
| 鄉鎮區代碼 |  |  |  | 序列號 |  |  |

幼兒姓名：\_\_\_\_\_ 性別：☐1 男 ☐2 女

幼兒母親(主要照顧者)姓名：\_\_\_\_\_ 電話：( ) \_\_\_\_\_

幼兒母親(主要照顧者)住址：

|    |                                         |
|----|-----------------------------------------|
| 地址 | _____ 縣市 _____ 鄉鎮市區 _____ 村里 _____ 路街   |
|    | _____ 段 _____ 巷 _____ 弄 _____ 號 _____ 樓 |
|    |                                         |

### 寶寶健康狀況：

M1. 體重：男生 < 6.73 公斤、女生 < 6.37 公斤 (第 2 頁 A1\_3) ☐

M2. 發展里程碑：第 1, 3, 5 及 7 項有任何一項勾選「還不會」(第 4 頁 A5) ☐

M3. 【訪員查核】：M1 及 M2 至少有一項打勾 ☐

### 家庭狀況【以寶寶父母親狀況為主】：

N1. 雙親目前為非已婚狀態(離婚、死亡、不知去向等)(第 6 頁 B3) ☐

N2. 雙親目前皆無全職工作(第 19 頁 F5、第 20 頁 F9) ☐

N3. 雙親皆無任何社會保險(第 19 頁 F3-F4，第 20 頁 F7-F8) ☐

N4. 自覺育兒經濟壓力「非常重」(第 21 頁 F12) ☐

N5. 父、母親至少有一個有重大傷病(第 22 頁 G6a 及 G6b) ☐

N6. 家庭功能量表分數為 0 (第 24 頁 G16) ☐

N7. 【訪員查核】：N1-N6 勾選兩項以上 ( $\geq 2$ ) ☐

N8. 幼兒母親(主要照顧者)是否同意國民健康局將寶寶的照顧情形資料轉介給當地的社會福利或醫療相關單位，請他們提供進一步的服務或幫助？

☐1 同意【附轉介同意書】

☐2 不需要/不同意

N9. 訪員姓名：\_\_\_\_\_

填報時間：民國\_\_\_\_年\_\_\_\_月\_\_\_\_日

【由國民健康局填寫】

轉介狀況：轉介至\_\_\_\_\_單位

【註一】：採用寶寶 15 個月未滿 18 個月大時的體重測量；此處之「體重不足」指寶寶體重低於平均值減 3 個標準差的值，男、女生標準分開計算。

【註二】：發展里程碑是測量寶寶通過 12 個月大發展里程碑的狀況。

【註三】：無全職工作：沒有工作，或每週工作低於 35 小時者均算。

【註四】：社會保險指公保、農保、勞保、軍保、福保、漁保或全民健保任一。

## P .特殊家庭註記 (若無特殊註記則不須填寫)

### P1.特殊家庭註記：【可複選】

- |                                                  |                                     |
|--------------------------------------------------|-------------------------------------|
| <input type="checkbox"/> 1. 父母感情瀕臨破裂分居中，或父母訴訟離婚中 |                                     |
| <input type="checkbox"/> 2. 父不詳或性侵生子             | <input type="checkbox"/> 3. 未婚生子    |
| <input type="checkbox"/> 4. 父親與她人同居              | <input type="checkbox"/> 5. 母親與他人同居 |
| <input type="checkbox"/> 6. 父親不知去向               | <input type="checkbox"/> 7. 母親不知去向  |
| <input type="checkbox"/> 8. 父親入獄服刑中              | <input type="checkbox"/> 9. 母親入獄服刑中 |
| <input type="checkbox"/> 10. 母親不願多談嬰兒生父          | <input type="checkbox"/> 11. 父親過世   |
| <input type="checkbox"/> 12. 家人不願多談嬰兒生母          | <input type="checkbox"/> 13. 母親過世   |
| <input type="checkbox"/> 14. 嬰兒由人領養              |                                     |
| <input type="checkbox"/> 15. 嬰兒父親精神疾病或心智不正常      |                                     |
| <input type="checkbox"/> 16. 嬰兒母親精神疾病或心智不正常      |                                     |
- ☐ 17. 嬰兒或父、母親為兩岸或國內、外居住者【續填 P2 寶寶居住狀況】
- ☐ 18. 其他(請說明)\_\_\_\_\_

【上述狀況補充說明】

### → 寶寶居住狀況

P2. 目前(訪問當時)寶寶住在哪裡？

- ☐ 1. 台灣地區      ☐ 2. 其他國家或地區(請說明)\_\_\_\_\_

P3. 過去六個月，寶寶的居住情形是哪一種？

- ☐ 1. 寶寶全都住在台灣

☐2. 大部分時間住在台灣（累計時間超過三個月），

少部分時間住在\_\_\_\_\_（國家或地區名稱）

☐3. 少部分時間住在台灣（累計時間低於三個月），

大部分時間住在\_\_\_\_\_（國家或地區名稱）
